# Supplementary material
Source: PubMed Central journal article supplement (PMC2579376)
Supplement: 0803494105_0803494105SI.pdf [file 0803494105_0803494105SI.pdf]

# Supporting Information

An et al. 10.1073/pnas.0803494105

## SI Materials and Methods

**Patients.** All patients had a confirmed diagnosis of B-cell precursor acute lymphoblastic leukaemia (BCP-ALL) and were entered onto a NCRI Childhood or Adult ALL Working Party treatment trial and registered on the Leukaemia Research United Kingdom Cancer Cytogenetics Group (UKCCG) Karyotype Database in Acute Leukaemia (1). Diagnostic cytogenetic and fluorescence in situ hybridization (FISH) analysis of bone marrow or peripheral blood was carried out in the U.K. regional genetic laboratories and described according to ISCN (2). The presence of a dicentric chromosome was confirmed with chromosome painting and locus-specific probes according to previous studies (3). In total, 110 patients harboured a dicentric involving the short arm of chromosome 9 involving 3 different partner chromosomes; dic(7;9)(p11;p11~13) ( $n = 13$ ), dic(9;12)(p11~13;p13) ( $n = 38$ ) and dic(9;20)(p11~13;q11) ( $n = 59$ ).

**FISH.** The position of deletion breakpoints were investigated with clones from the National Center for Biotechnology Information map for chromosomes 9, 12 and 20. DNA clones were extracted, labeled, hybridized and visualized using standard methodologies. Probes on the long arm of each chromosome were used as controls. The involvement of *PAX5* was determined with a dual-color break-apart probe constructed from clones position proximal (RP11-297B17) and distal (RP11-344B23) to the gene.

**Molecular Copy-Number Counting (MCC).** MCC was carried out as described in refs. 4 and 5 with slight modifications. Human male genomic DNA (Promega) was used in preliminary experiments to determine the working concentration of DNA for MCC. A series of dilutions were made to give  $\approx 0.25$ –8 genomes of DNA per aliquot. The copy-number change of genomic loci (i.e., markers) in the *PAX5* gene (located on chromosome 9p; 2 copies per genome) and in the *MGC39900* gene (located on chromosome Xq; 1 copy per genome) was analyzed by MCC using 96-well plates, as described in refs 4 and 5. A clear copy-number change was observed at the concentration of 0.03 genomes/ $\mu$ L (0.09 pg/ $\mu$ L) of genomic DNA that was used as the working concentration for MCC analyses of the patient (data not shown).

Markers covering *PAX5* exon 2, 3, 4, 5, 7, 8 and 9 were chosen to confirm FISH results of dicentric chromosomal ALLs with breakpoints in the *PAX5* gene on chromosome 9p13. Markers in *PAX5* intron 4 and 7 were analyzed subsequently to further refine the breakpoints. Three PCR primers (external forward, internal forward and common reverse) were designed to amplify each marker. The genomic locations of the markers and sequences of the primers are shown in Table S3.

A seminested PCR assay was performed for MCC. For the first PCR, a master mix was prepared that contained 1  $\times$  GoTaq Flexi buffer (Promega), 1.5–2.0 mM MgCl<sub>2</sub>, 200  $\mu$ M each dNTP, the external forward and common reverse PCR primers of all markers to be analyzed (0.15  $\mu$ M each oligo), 0.05 u/ $\mu$ L GoTaq Flexi DNA polymerase (Promega) and  $\approx 0.09$  pg/ $\mu$ L of genomic DNA. An aliquot of 10  $\mu$ L of the master mix was dispensed into each of 88 wells of a 96-well plate, and 10  $\mu$ L of a similar mix lacking DNA was aliquoted into the remaining 8 wells as negative controls. PCR was performed using an MJ PTC-225 Thermal Cycler (MJ Research) with hot start at 95  $^{\circ}$ C for 2 min, then 30 cycles of 30 sec at 95  $^{\circ}$ C, 30 sec at 52–56  $^{\circ}$ C and 1 min at 72  $^{\circ}$ C, followed by a terminal extension at 72  $^{\circ}$ C for 7 min. After first PCR, each reaction was diluted to 200  $\mu$ L with water, and 2  $\mu$ L of the diluted first PCR product was used as template

in each second PCR, containing 0.5  $\mu$ M the relevant internal-forward and common reverse primers for each specific marker (same concentrations of other reagents as in first PCR). The same thermocycling was carried out for second PCR.

After second PCR, 3  $\mu$ L of each reaction was mixed with 2  $\mu$ L of formamide dye mix (98% formamide, 10 mM EDTA/pH 8.0, 0.015% xylene cyanol FF), and loaded on 192-well horizontal 7.5% polyacrylamide gel (MadgeBio Ltd, Grantham, U.K.). The amplified second PCR products were separated by electrophoresis for 15 min at 200 V, then the gel was stained in 1  $\times$  SYBR Gold (Invitrogen) for 10 min and scanned using Typhoon Trio Imager (Amersham). The presence or absence of PCR product in each well was scored using MADGE-specific gel image analysis software (Phoretix), and MCC data were analyzed as described in refs. 4 and 5.

**Long-distance Inverse PCR (LDI-PCR) Cloning.** LDI-PCR was carried out as described in refs. 5 and 6 with modifications. Briefly, 1  $\mu$ g of genomic DNA was digested with 10 units of the relevant restriction enzyme (New England BioLabs) overnight. The digested DNA was purified using QIAquick PCR Purification Kit (Qiagen), and 0.4  $\mu$ g of purified DNA was ligated at 4  $^{\circ}$ C overnight in a total volume of 200  $\mu$ L with 5 units of T4 DNA ligase (Promega). The ligated DNA was then purified using the same kit and eluted in a final volume of 30  $\mu$ L. For the first PCR, 10  $\mu$ L of the ligated DNA was used in a 25  $\mu$ L of reaction mixture, containing 1  $\times$  GoTaq Flexi buffer (Promega), 1.5 mM MgCl<sub>2</sub>, 200  $\mu$ M each dNTP, 0.2  $\mu$ M first-forward and reverse PCR primers, and 0.08 u/ $\mu$ L GoTaq Flexi DNA polymerase (Promega). PCR was carried out with hot start at 95  $^{\circ}$ C for 2 min, then 35 cycles of 40 sec at 95  $^{\circ}$ C, 40 sec at 55  $^{\circ}$ C and 5 min at 72  $^{\circ}$ C, followed by a final extension at 72  $^{\circ}$ C for 10 min. The second PCR mixture contained 5  $\mu$ L of the first PCR product, 0.2  $\mu$ M second-forward and the same reverse primers in a final volume of 50  $\mu$ L (same concentrations of other reagents and same PCR conditions as before). The PCR product was separated on 0.8% agarose gel and purified for direct sequencing. The second-forward and reverse PCR primers were used as sequencing primers. The sequences of LDI-PCR primers are shown in Table S4.

**Genomic Breakpoint Cloning with PCR.** A seminested PCR was carried out to amplify the fusion sequences in 5 dic(9;12) cases where good quality genomic DNA was available (cases 2616, 3742, 4662, 8952, and 10630). Two oligos spanning *PAX5* exon 4 and the beginning of intron 4 were chosen as the common first-(AGCCACCCAACCAACCAG) and second-forward (GTACAGCATAGGTAAGAGG) primers. A set of 4 scattering oligos in *ETV6* intron 2 (base pairs 11833587–11859330) were chosen as reverse primers. The sequences of reverse primers are as follows: GAGGAGAGTGAGGCAGG (base pairs 11833587–11833603), CTTACAGGAATCTTTATGG (base pairs 11835721–11835739), GCACCCTCCATACCTAAG (base pairs 11854626–11854643) and CACTAAGTCCTAAGTAGG (base pairs 11859313–11859330). PCR was performed using GoTaq Flexi DNA polymerase (Promega), according to the manufacturer's recommendation. The PCR product was purified for direct sequencing as described above.

**Fusion Protein Sequences Prediction.** Sequences of chimeric proteins were predicted using the online program GENSCAN (<http://genes.mit.edu/GENSCAN>).

**Quantitative Analysis of PAX5 and Target Gene Expression.** Real-Time quantitative RT-PCR (qRT-PCR) was carried out to assess the expression of *PAX5* (exon boundaries 1/2 and 4/5) and *PAX5*-target genes; *EBF1*, *FLT3*, *ALDH1A1* and *ATP9A* genes, using the Taqman Gene Expression Assays (Applied Biosystems) according to the manufacturer's instructions. Seven patients with dicentric chromosomes were compared with 6 cases with a high-hyperdiploidy karyotype (where chromosome 9 was diploid). The comparative Ct method was used for quantitation of relative gene expression. The average Ct value of the endogenous control gene, *GAPDH*, was subtracted from the average experimental gene Ct value to give the  $\Delta$ Ct value. Differences between control and test were carried out by using  $\Delta\Delta$ Ct. Differences in gene expression between the 2 groups was performed using a standard *t* test.

**Mutation Analysis of PAX5.** *PAX5* exons, previously identified to house mutations in childhood ALL, were amplified by PCR using genomic or whole genome amplified DNA from dicentric cases. The amplicons were then screened for mutations by DHPLC using a Transgenomic Wave machine (Crewe). Primer sequences were those previously cited (7) and the DHPLC

parameters used are available on request. For those amplicons with chromatographic profiles that differed from wild type, direct sequencing was performed by purifying 100  $\mu$ L of PCR product using a Qiaquick PCR purification kit (Qiagen) with a final elution volume of 30  $\mu$ L and then sequenced using both forward and reverse primers with the ABI Version 3 BigDye terminator cycle sequencing kit and analyzed on an ABI prism DNA sequencer (Applied Biosystems). Sequence alignments were carried out using DS gene software (Accelrys).

**PAX5 Copy Number Analysis with Quantitative Genomic PCR.** This assay was performed as described in ref. 7 but using *ATP10A* as the control gene. Briefly, 5-point standard curves ranging from 150 ng to 1 ng/reaction were constructed using normal human genomic DNA (Roche) and amplified for the 3 target *PAX5* exons (exons 3, 6, and 8) and control *ATP10* gene. Assays were performed in duplicate on 2 separate occasions with 50 ng of sample DNA per 20  $\mu$ L reaction using a Taqman 7500 Real-Time PCR System (Applied Biosystems). *PAX5* gene dosage for each exon were calculated by dividing the value obtained for *PAX5* by the corresponding value for *ATP10A*. The primer sequences are shown in [Table S5](#).

- Harrison CJ, Martineau M, Secker-Walker LM (2001) The Leukaemia Research Fund/ United Kingdom Cancer Cytogenetics Group Karyotype Database in acute lymphoblastic leukaemia: A valuable resource for patient management. *British J Haematol* 113:3–10.
- ISCN, ed (2005) *An International System for Human Cytogenetic Nomenclature* (S. Karger, Basel).
- Clark R, et al. (2000) Monosomy 20 as a pointer to dicentric (9;20) in acute lymphoblastic leukemia. *Leukemia* 14:241–246.
- Daser A, et al. (2006) Interrogation of genomes by molecular copy-number counting (MCC). *Nat Methods* 3:447–453.
- Jalali GR, et al. (2007) Disruption of ETV6 in intron 2 results in upregulatory and insertional events in childhood acute lymphoblastic leukaemia. *Leukemia* 22:114–123.
- Willis TG, et al. (1997) Rapid molecular cloning of rearrangements of the IGJ locus using long-distance inverse polymerase chain reaction. *Blood* 90:2456–2464.
- Mullighan CG, et al. (2007) Genome-wide analysis of genetic alterations in acute lymphoblastic leukaemia. *Nature* 446:758–764.



**Table S1. The clinical and cytogenetic data on patients with dicentric chromosomes, with the molecular investigation performed on each case**

| Patient ID | Gender | Age | Karyotype                                                                                                                                                                                      | Diagnostic FISH   | Analysis         | PAX5    |
|------------|--------|-----|------------------------------------------------------------------------------------------------------------------------------------------------------------------------------------------------|-------------------|------------------|---------|
| 07- 978    | F      | 3   | 45,XX,dic(7;9)(p13;p11),?t(9;22;21)(q34;q11;q22),add(20)(p)[10]/49,idem,+2,+5,+dic(7;9)(p13;p11),+18[12]/46,XX[15]                                                                             | <i>BCR—ABL</i>    | —                | —       |
| 07- 1483   | F      | 5   | 46,XX,dic(7;9)(q36;p12),del(14)(q24q32),+21c[13]/47,XX,+21c[2]                                                                                                                                 | —                 | —                | —       |
| 07- 2378   | F      | 34  | 45,XX,dic(7;9)(q10;q10)[12]                                                                                                                                                                    | Normal            | —                | —       |
| 07- 2521   | M      | 17  | 45,XY,dic(7;9)(p11;p11)[14]/46,XY[1]                                                                                                                                                           | —                 | —                | —       |
| 07- 4462   | F      | 13  | 45,XX,dic(7;9)(p11;p11)[7]/46,XX[3]                                                                                                                                                            | —                 | —                | —       |
| 07- 5679   | M      | 18  | 45,XY,dic(7;9)(p11;p11)[6]/46,XY[5]                                                                                                                                                            | Normal            | —                | —       |
| 07- 5779   | F      | 46  | 45,XX,dic(7;9)(p11;p11)[18]/46,XX[2]                                                                                                                                                           | Normal            | BD               | Del     |
| 07- 5861   | F      | 44  | 45,XX,dic(7;9)(p11;p11)[8]/46,XX[2]                                                                                                                                                            | Normal            | BD               | Del     |
| 07- 7106   | M      | 6   | 45,XY,dic(7;9)(p11;p11),t(9;22)(q34;q11)[1]/46,XY[49]                                                                                                                                          | <i>BCR—ABL</i>    | BD, MCC, BPC, RT | Par del |
| 07- 7777   | M      | 42  | 45,XY,dic(7;9)(p1;p1)[6]/46,XY[5]                                                                                                                                                              | Normal            | —                | —       |
| 07- 9465   | M      | 2   | 45~46,XY,del(6)(q1q2),dic(7;9)(p1;p1),inc6/46,XY[7]                                                                                                                                            | Normal            | BD               | Del     |
| 07- 10194  | M      | 11  | 45,XY,dic(7;9)(p1?;p1?),t(9;22)(q34;q11)[9]/46,XY[2]                                                                                                                                           | <i>BCR—ABL</i>    | —                | —       |
| 07- 11161  | M      | 51  | 45,XY,dic(7;9)(p11;p11)[10]                                                                                                                                                                    | Normal            | —                | —       |
| 12- 446    | M      | 6   | 93?<4n>,XXYY,dic(9;12)(p1?;p1?),add(11)(q23),+mar1,+mar2,+r,inc9                                                                                                                               | —                 | —                | —       |
| 12- 774    | M      | 3   | 45,XY,dic(9;12)(p11;p12)[3]/46,XY[18]                                                                                                                                                          | —                 | BD               | Del     |
| 12- 1380   | M      | 4   | 45,XY,del(6)(q?13q?15),dic(9;12)(p11;p11),t(12;13)(p13;q14)[11]/46,XY[1]                                                                                                                       | —                 | —                | —       |
| 12- 1441   | M      | 5   | 46,XY,del(2)(q?23q?31),+8,dic(9;12)(p11~p12;p11~p12),add(10)(q?22),del(17)(p13)[8]/45,XY,dic(9;12)(p11~p12;p11~p12),der(18)t(8;18)(q13;q11)[2]/46,XY[3]                                        | —                 | —                | —       |
| 12- 1620   | M      | 9   | 47,XY,del(12)(p12),+21[9]/46,idem,dic(9;12)(p11;p11)[5]/46,XY[6]                                                                                                                               | <i>ETV6—RUNX1</i> | —                | —       |
| 12- 2392   | M      | 3   | 45,XY,dic(9;12)(p11;p11)[14]/46,XY[6].ish dic(9;12)(wcp9+,wcp12+)                                                                                                                              | —                 | BD               | Del     |
| 12- 2398   | M      | 5   | 45,XY,dic(9;12)(p11;p11)[5]/49,idem,+5,+8,+16,+21[3]/46,XY[1]                                                                                                                                  | —                 | BD, MCC, BPC     | Par del |
| 12- 2400   | M      | 2   | 46,XY,dic(9;12)(p?21;p11.1),+mar[4]/46,XY[3]                                                                                                                                                   | <i>ETV6—RUNX1</i> | BD               | Del     |
| 12- 2616   | M      | 14  | 44,XY,der(4;17)(p10;q10),dic(9;12)(p11;p11)[4]/45,idem,+der(17;21)(q10;q10)[8]/46,XY[2]                                                                                                        | Normal            | BD, BPC          | Par del |
| 12- 3070   | F      | 27  | 45,XX,dic(9;12)(p1;p1),der(19)t(1;19)(q23;p13)[3]/46,XX[4]                                                                                                                                     | Normal            | —                | —       |
| 12- 3255   | M      | 14  | 45,XY,dic(9;12)(p11;p11),del(13)(q?3),add(20)(q13)[5]/46,idem,+8[3]/45,idem,-4,-del(13)(q?3),+mar1,+mar2[2]/45,XY,-1,dic(9;12)(p11;p11),-10,del(13)(q?3),add(20)(q13),+mar3,+mar4[1]/46,XY[20] | Normal            | BD               | Par del |
| 12- 3278   | M      | 14  | 46,XY,dic(9;12)(p12;p12),+12[19]/46,XY[1]                                                                                                                                                      | Normal            | BD               | Del     |
| 12- 3295   | M      | 11  | 46~47,XY,del(2)(p16),+8,dic(9;12)(p1;p1),+r,+mar11                                                                                                                                             | —                 | —                | —       |
| 12- 3742   | M      | 8   | 45,XY,dic(9;12)(p11~12;p11~12)[22]/46,idem,+mar[3]/46,XY[8]                                                                                                                                    | Normal            | BD, BPC          | Par del |
| 12- 3790   | M      | 3   | 46,XY,dic(9;12)(p1?;p1?),del(11)(q?)[6]/46,XY[6]                                                                                                                                               | <i>ETV6—RUNX1</i> | BD               | Del     |
| 12- 3979   | M      | 12  | 46,XY,+8,add(9)(p),+add(9)(p),dic(9;12)(p11;p11),-10,del(17)(p11),+22[11]/80~86,idemx2,-2,-7,-8,-8,-add(9)(p),-add(9)(p),-dic(9;12)(p11;p11),-del(17)(p11),-18,-20,-?22,-?22,+mar1x25/46,XY[3] | Normal            | BD, RT           | Par del |

| Patient ID | Gender | Age | Karyotype                                                                                                                                              | Diagnostic FISH   | Analysis     | PAX5    |
|------------|--------|-----|--------------------------------------------------------------------------------------------------------------------------------------------------------|-------------------|--------------|---------|
| 12-4049    | F      | 28  | 45,XX,dic(9;12)(p17;p17),<br>del(17)(p11p13)[20]                                                                                                       | Normal            | BD           | Par del |
| 12-4443    | F      | 1   | 45,XX,dic(9;12)(p?;p?)9/ 46,XX[4]                                                                                                                      | Normal            | BD, MCC, BPC | Par del |
| 12-4512    | M      | 2   | 45,XY,dic(9;12)(p17;p17)[5]/ 46,XY[1]                                                                                                                  | <i>ETV6—RUNX1</i> | —            | —       |
| 12-4519    | F      | 11  | 45,XX,dic(9;12)(p?1;p?1)[8]/ 46,XX[2]                                                                                                                  | Normal            | —            | —       |
| 12-4554    | M      | 2   | 45,XY,del(12)(p)[3]/ 45,XY,dic(9;12)(p1;<br>p1)[4]/ 46,XY[5]                                                                                           | <i>ETV6—RUNX1</i> | —            | —       |
| 12-4662    | M      | 13  | 45,XY,dic(9;12)(p11;p11)[22]/<br>46,XY,+8,dic(9;12)(p11;p11)[3]/ 46,XY[5]                                                                              | Normal            | BD, BPC      | Par del |
| 12-4698    | M      | 4   | 46,XY[1]/ 45,XY,dic(9;12)(?) [1]                                                                                                                       | <i>ETV6—RUNX1</i> | BD, RT       | Del     |
| 12-4936    | M      | 4   | 46,XY,dic(9;12)(p17;p11.2)[7]/ 46,XY[1]                                                                                                                | <i>ETV6—RUNX1</i> | BD           | Par del |
| 12-4946    | M      | 15  | 46,XY,+8,dic(9;12)(p13;p17)[7]/<br>47,idem,+8[1]                                                                                                       | Normal            | BD           | Par del |
| 12-5928    | M      | 19  | 44,XY,del(6)(q13q25),-7,dic(9;12)(p1;p1),<br>add(11)(q25),add(18)(q21)[2]/ 46,XY[28]                                                                   | Normal            | BD           | Par del |
| 12-5999    | M      | 14  | 45,XY,dic(9;12)(p1;p1),add(11)(q2),-13,<br>der(19)t(1;19)(q23;p13),+mar[8]/<br>47,XY,+X,add(2)(p1),add(11)(q2),-13,<br>der(19)t(1;19)(q23;p13),+mar[2] | <i>PBX1—TCF3</i>  | BD           | Par del |
| 12-6067    | F      | 38  | 45,XX,dic(9;12)(p11;p11)[8]/<br>46,idem,+8[4],46,XX[3]                                                                                                 | Normal            | BD           | Par del |
| 12-7088    | M      | 19  | 45,XY,dic(9;12)(p13;p13)[5]/ 46,XY[4]                                                                                                                  | Normal            | BD           | Par del |
| 12-8726    | F      | 16  | 44,X,der(X)t(X;3)(p22;q21),-3,dic(9;12)(p11;<br>p11)10/ 46,XX[7]                                                                                       | Normal            | BD, BPC      | Par del |
| 12-8952    | M      | 21  | 46,XY,+8,dic(9;12)(p13;p13)[8]/ 46,XY[2]                                                                                                               | Normal            | BD, BPC      | Par del |
| 12-9119    | M      | 12  | 46,XY,+8,dic(9;12)(p13;p13)[10]                                                                                                                        | Normal            | BD, BPC, RT  | Par del |
| 12-9380    | F      | 16  | 46,XX,ins(3;?) (q?22;?),+8,dic(9;12)(p13;<br>p13)[5]/ 46,XX[4]                                                                                         | Normal            | BD           | Par del |
| 12-10064   | F      | 46  | 45,XX,der(8)t(8;8)(p?23;q?13),der(2)t(2;<br>9)(?p?;q?25),dic(9;12)(p13;p13)[6]/<br>46,XX[4]                                                            | Normal            | BD           | Par del |
| 12-10630   | M      | 10  | 45,XY,dic(9;12)(q10;q10)[4]/ 46,XY[2]                                                                                                                  | Normal            | BD, BPC      | Par del |
| 12-12349   | F      | 18  | 45,XX,del(6)(q?13q?27),dic(9;12)(p13;p11),<br>add(10)(p11)[10]/ 46,XX[25]                                                                              | —                 | —            | —       |
| 12-12600   | F      | 14  | 45,XX,i(8)(q10),dic(9;12)(p11;p11),der(17)t(?X;<br>17)(?q12;?p11)[10]                                                                                  | Normal            | —            | —       |
| 20-198     | F      | 2   | 45,XX,dic(9;20)(p12;q11)[25]/ 46,XX[8]                                                                                                                 | —                 | —            | —       |
| 20-468     | F      | 2   | 46,XX,dic(9;20)(p17;q11),+21[8]/<br>46,XX[12]                                                                                                          | —                 | —            | —       |
| 20-508     | F      | 2   | 45,XX,dic(9;20)[11]/ 46,XX[9]                                                                                                                          | —                 | —            | —       |
| 20-745     | M      | 2   | 45,XY,dic(9;20)(p11~p12;q11)[11]/<br>46,XY[15]                                                                                                         | —                 | —            | —       |
| 20-753     | F      | 2   | 45,XX,inv(7)(p11q22),dic(9;20)(p17;<br>q11)[21]/ 46,XX[9]                                                                                              | —                 | —            | —       |
| 20-1127    | F      | 2   | 45,XX,dic(9;20)4/ 46,XX[7]                                                                                                                             | —                 | —            | —       |
| 20-1534    | F      | 1   | 45,XX,dic(9;20)(p12;q11)[9]/<br>45,idem,inv(9)(p22q12)[3]/ 46,XX[5]                                                                                    | —                 | —            | —       |
| 20-1553    | M      | 1   | 45,XY,dic(9;20)[5]/ 46,XY[58]                                                                                                                          | —                 | BD           | Del     |
| 20-1616    | F      | 2   | 46,XX,del(9)(p22)[2]/<br>49,idem,+X,dic(9;20)(p12;q11),<br>+10,+21,+21[15]/ 49,idem,+X,+10,<br>del(17)(p13),-20,+21,+21[2]/ 46,XX[3]                   | —                 | —            | —       |
| 20-1729    | M      | 5   | 45,XY,dic(9;20)(p12;q11)[4]/<br>46,idem,+X[2]/ 45,idem,del(11)(q21)[1]/<br>46,XY[2]                                                                    | —                 | —            | —       |
| 20-1846    | F      | 6   | 45,XX,dic(9;20)(p17;q11),<br>del(11)(q14q23)[5]                                                                                                        | —                 | —            | —       |
| 20-1920    | F      | 2   | 45,XX,dic(9;20)(p17;q11)[3]/ 46,XX[4]                                                                                                                  | —                 | —            | —       |
| 20-2208    | M      | 17  | 45,XY,dic(9;20)(p17;q11)[5]/<br>46,idem,+mar[6]/ 46,XY[6]                                                                                              | —                 | —            | —       |
| 20-2384    | F      | 5   | 46,XX,del(9)(p21)[2]/<br>46,idem,del(6)(q15q21)[4]/<br>45,idem,dic(9;20)(p17;q11)[3]/<br>45,idem,del(6)(q15q21),dic(9;20)(p17;<br>q11)[1]/ 46,XX[5]    | —                 | BD           | Del     |

| Patient ID | Gender | Age | Karyotype                                                                                                                        | Diagnostic FISH | Analysis     | PAX5    |
|------------|--------|-----|----------------------------------------------------------------------------------------------------------------------------------|-----------------|--------------|---------|
| 20-2443    | F      | 2   | 46,XX,dic(9;20)(p1?2;q11),+mar[3]/48,idem,+2mar[3]/46,XX[2]                                                                      | —               | —            | —       |
| 20-2763    | F      | 8   | 46,XX,dic(9;20)(p1;q1),+21[4]/46,XX[30]                                                                                          | Normal          | —            | —       |
| 20-2857    | M      | 23  | 45,XY,dic(9;20)[6]/46,XY[4]                                                                                                      | —               | —            | —       |
| 20-2894    | M      | 5   | 46,XY,dic(9;20)(p12;q11),+21[7]/46,XY[10]                                                                                        | Normal          | BD           | Del     |
| 20-3087    | M      | 14  | 46-48,XY,add(1)(q2?),dic(9;20),del(17)(p11.2),+18,+21                                                                            | Normal          | BD           | Del     |
| 20-3101    | M      | 13  | 45,XY,dic(9;20)(p11;q11),?16[3]                                                                                                  | —               | —            | —       |
| 20-3155    | F      | 13  | 46,XX,dic(9;20)(p11;q11),+21[8]/46,idem,i(8)(q10)[8]/46,idem,add(15)(p10)[6]/46,XX[6]                                            | —               | —            | —       |
| 20-3275    | F      | 11  | 45,XX,dic(9;20)(p12;q11)[5]/46,XX,idem,+20[3]/52,XX,idem,+6,+8,+9,+12,+18,+20,+22[15]/52,idem,+6,+8,+dic(9;20,+12,+18,+20,+22[2] | Normal          | —            | —       |
| 20-3363    | F      | 32  | 46,XX,dic(9;20)(p12;q11),+21[10]/46,XX[1]                                                                                        | Normal          | —            | —       |
| 20-3450    | M      | 2   | 45,XY,dic(9;20)(p11~13;q11)[13]/46,XY[7]                                                                                         | Normal          | —            | —       |
| 20-3507    | F      | 4   | 47,XX,+X,dic(9;20)(p11;p11),t(9;14)(p21;q11),+21[12]/47,idem,del(5)(q22q34)[3]/46,XX[8]                                          | Normal          | —            | —       |
| 20-3599    | M      | 1   | 46,XY,t(5;12)(q33;p13),del(9)(p13)[2]/46,idem,-del(9)(p13),dic(9;20)(p12-13;q13.3)[3]/46,XY[6]                                   | —               | —            | —       |
| 20-3916    | M      | 24  | 45,XY,dic(9;20)(p1,q11)[7]/46,XY[3]                                                                                              | Normal          | —            | —       |
| 20-4039    | M      | 7   | 45,XY,dic(9;20)(p11;q11),-20[5]/46,idem,+18[5]                                                                                   | Normal          | —            | —       |
| 20-4141    | M      | 11  | 46,XY,dic(9;20)(p11;q11),+21[6]/47,idem,+15[2]/46,XY[1]                                                                          | Normal          | —            | —       |
| 20-4377    | F      | 15  | 45,XX,dic(9;20)(p1?3;p11)[21]                                                                                                    | Normal          | BD           | Del     |
| 20-4451    | F      | 2   | 45,XX,dic(9;20)(p1;q1),del(16)(q22)                                                                                              | Normal          | BD, MCC, BPC | Par del |
| 20-4485    | M      | 6   | 46,XY,del(1)(p1?p3?1),dic(9;20)(p1;q1),+21[9]/46,XY[1]                                                                           | Normal          | —            | —       |
| 20-4506    | M      | 6   | 46,XY,+8,dic(9;20)(p13;q11.2?)[5]/47,idem,+16[1]                                                                                 | Normal          | BD           | Del     |
| 20-4510    | F      | 2   | 45,XX,dic(9;20)(p11;p11)[8]/46,idem,+21[2]/46,XX[2]                                                                              | Normal          | BD           | Del     |
| 20-4549    | M      | 51  | 46,XY,dic(9;20)(p1?;q1?),+21[9]/46,XY,dic(9;20),+20,r(20)(p?q?)[6]/45,XY,dic(9;20),add(20)(q13)[4]/46,XY[1]                      | Normal          | BD           | Del     |
| 20-4718    | F      | 2   | 45,XX,t(5;9)(?q13;p22),dic(9;20)(p11-13;q11)[11]/45,idem,?del(6)(q)[7]/46,XX[2]                                                  | Normal          | BD           | Del     |
| 20-4887    | F      | 8   | 45,XX,-7,dic(9;20)(p1?;q1?)[14]/46,XX[6]                                                                                         | Normal          | BD           | Del     |
| 20-5037    | F      | 1   | 45,XX,dic(9;20)(p11;q11)                                                                                                         | Normal          | —            | —       |
| 20-5618    | F      | 2   | 45,XX,dic(9;20)(p11;q11)[11]/46,XX[4]                                                                                            | Normal          | BD, MCC, BPC | Par del |
| 20-5824    | F      | 3   | 46,XX,dic(9;20)(p11;q11),+21[5]/47,idem,+X[2]/48,idem,+X,+?9[2]/46,XX[2]                                                         | Normal          | BD           | Del     |
| 20-6789    | F      | 4   | 46-47,XX,del(6)(q1q2),+7,dic(9;20)(p11;q11),+mar9/46,XX[8]                                                                       | Normal          | BD           | Del     |
| 20-6897    | M      | 1   | 45,XX,dic(9;20)(p11;q11)[10]/46,XX[2]                                                                                            | Normal          | BD           | Pres    |
| 20-7063    | F      | 7   | 46,XX,del(6)(q16q24.1),dic(9;20)(p13.2;q1),+21[10]                                                                               | Normal          | BD           | Del     |
| 20-7167    | F      | 1   | 45,XX,t(7;15)(p1;q1),dic(9;20)(p13;q11)[8]/46,XX[2]                                                                              | Normal          | BD           | Del     |
| 20-7201    | M      | 16  | 45,XY,der(2)t(2;9)(q3;p?2),der(9)del(9)(p21p21)t(2;9)(q3;p?2),-7,dic(9;20)(p13;q11),+20[10]                                      | Normal          | BD           | Del     |
| 20-7209    | F      | 2   | 45,XX,dic(9;20)(p11-13;q11)[6]/46,XX[4]                                                                                          | Normal          | BD           | Del     |
| 20-7339    | F      | 2   | 45,XX,dic(9;20)(p11;q11)[6]/46,XX[1]                                                                                             | Normal          | —            | —       |
| 20-7550    | M      | 8   | 46,XY,dic(9;20)(p1;q11),+mar[8]/46,XY[2]                                                                                         | Normal          | BD, MCC, BPC | Par del |
| 20-8330    | M      | 4   | 45,XY,dic(9;20)(p11;q11)[6]/46,XY[4]                                                                                             | Normal          | —            | —       |

| Patient ID | Gender | Age | Karyotype                                                                                                                                                              | Diagnostic FISH   | Analysis | PAX5 |
|------------|--------|-----|------------------------------------------------------------------------------------------------------------------------------------------------------------------------|-------------------|----------|------|
| 20-8901    | M      | 3   | 45,XY,dic(9;20)(p13;q11),del(9)(q2q3),del(16)(q22)[9]/45,XY,-9,del(16)(q22),?der(20)t(9;20)(q22;q11)[3]/46,XY,-9,del(16)(q22),?der(20)t(9;20)(q22;q11),+21[5]/46,XY[3] | Normal            | BD       | Del  |
| 20-9491    | M      | 4   | 46,XY,dic(9;20)(p1?1;q11),+21                                                                                                                                          | Normal            | —        | —    |
| 20-10061   | M      | 4   | 46,XY,dic(9;20)(p1?1;q11),+21,+mar[7]/46,XY[2]                                                                                                                         | Normal            | BD, RT   | Del  |
| 20-10219   | M      | 48  | 45,XY,dic(9;20)(p1;q11)[10]                                                                                                                                            | Normal            | BD       | Del  |
| 20-10401   | F      | 1   | 45,XX,dic(9;20)(p13.2;q11.21)[6]/46,XX[14]                                                                                                                             | Normal            | BD       | Pres |
| 20-10537   | F      | 7   | 46,XX,dic(9;20)(p11~13;q11.22),+mar[2]/46,XX[23]                                                                                                                       | <i>ETV6—RUNX1</i> | BD       | Del  |
| 20-10862   | F      | 4   | 46,XX,dic(9;20)(p13;q11),+21[11]/46,XX[3]                                                                                                                              | Normal            | —        | —    |
| 20-10868   | F      | 2   | 48,XX,+X,del(9)(p2?),+10,del(15)(q2?2),dic(9;20)(p11~13;q11.21),+21[7]/46,XX[4]                                                                                        | Normal            | BD, RT   | Del  |
| 20-11906   | M      | 8   | 45,XY,dic(9;20)(p11~13;q11)                                                                                                                                            | Normal            | —        | —    |

Gender, Male (M) and Female (F), Several cases were diagnosed with RT-PCR (!), breakpoint delineation with FISH probes (BD), molecular copy number counting (MCC), breakpoint cloning (BPC), quantitative reverse transcriptase PCR (RT), no material available for analysis (-), loss of PAX5 (Del), partial deletion (Par Del) and retained (Pres).

**Table S2. Quantitative PCR data for PAX5 and PAX5 target gene expression in ALL patients with dicentric chromosomal abnormalities (1) and a high-hyperdiploidy chromosome complement (2)**

| Patients ID           | PAX5 exon 1/2      |             | PAX5 exon 4/5      |             | EBF1               |             | FLT3               |             | ALDH1A1            |             | ATP9A              |             |
|-----------------------|--------------------|-------------|--------------------|-------------|--------------------|-------------|--------------------|-------------|--------------------|-------------|--------------------|-------------|
|                       | $\Delta\Delta C_t$ | Fold change |
| 12-3979 <sup>1</sup>  | -6.24              | 75.58       | -4.7               | 25.99       | -1.07              | 2.1         | -4.22              | 18.64       | 7.09               | 0.01        | 7.61               | 0.01        |
| 12-4698 <sup>1</sup>  | -4.71              | 26.17       | -4.73              | 26.54       | -1.77              | 3.41        | -5.56              | 47.18       | 7.5                | 0.01        | 7.52               | 0.01        |
| 12-9119 <sup>1</sup>  | -6.28              | 77.71       | -4.71              | 26.17       | -3.26              | 9.58        | -5.28              | 38.85       | 6.75               | 0.01        | 4.41               | 0.05        |
| 12-9380 <sup>1</sup>  | -6.18              | 72.5        | -4.7               | 25.99       | -1.62              | 3.07        | -4.93              | 30.48       | 6.94               | 0.01        | 6.9                | 0.01        |
| 20-10061 <sup>1</sup> | -4.77              | 27.28       | -4.73              | 26.54       | -2.2               | 4.59        | -6.55              | 93.70       | 8.81               | 0           | 4.71               | 0.04        |
| 20-10868 <sup>1</sup> | -4.67              | 25.46       | -4.71              | 26.17       | -1.79              | 3.46        | -5.85              | 57.68       | 7.71               | 0           | 4.32               | 0.05        |
| 07-7106 <sup>1</sup>  | -5.73              | 53.08       | -4.68              | 25.63       | -1.53              | 2.89        | -3.36              | 10.27       | 6.91               | 0.01        | 4.5                | 0.04        |
| 11384 <sup>2</sup>    | -6.42              | 85.63       | -6.37              | 82.71       | -6.85              | 115.36      | -1.53              | 2.89        | 2.48               | 0.18        | 1.37               | 0.39        |
| 11387 <sup>2</sup>    | -6.96              | 124.5       | -6.9               | 119.43      | -4.9               | 29.86       | -2.42              | 5.35        | 2.07               | 0.24        | 2.28               | 0.21        |
| 11674 <sup>2</sup>    | -6.92              | 121.1       | -6.94              | 122.79      | -5.26              | 38.32       | -2.72              | 6.59        | 2.72               | 0.15        | 1                  | 0.5         |
| 11738 <sup>2</sup>    | -7.35              | 163.14      | -7.41              | 170.07      | -6.15              | 71.01       | 5.18               | 0.03        | 2.91               | 0.13        | -0.65              | 1.57        |
| 11884 <sup>2</sup>    | -8.83              | 455.09      | -8.87              | 467.88      | -6.42              | 85.63       | -1.9               | 3.73        | 3.02               | 0.12        | 1.45               | 0.37        |
| 12202 <sup>2</sup>    | -6.85              | 115.36      | -6.79              | 110.66      | -5.57              | 47.50       | -1.95              | 3.86        | 2.51               | 0.18        | 0.09               | 0.94        |

- Harrison CJ, Martineau M, Secker-Walker LM (2001) The Leukaemia Research Fund/United Kingdom Cancer Cytogenetics Group Karyotype Database in acute lymphoblastic leukaemia: a valuable resource for patient management. *British J Haematol* 113:3-10.
- ISCN, ed (2005) *An International System for Human Cytogenetic Nomenclature* (S. Karger, Basel).



**Table S3. Primer sequences for MCC analysis of PAX5**

| Marker (location in PAX5 in bp) | External forward primer sequence | Internal forward primer sequence | Common reverse primer sequence |
|---------------------------------|----------------------------------|----------------------------------|--------------------------------|
| 1 (37010544–37010810)           | GATCTGTTTTCAGGACATGG             | CATCTCCAGGCAGCTTCG               | CTATGATACTGTTCATATTGG          |
| 2 (37004914–37005184)           | GAGACAGGAAGCATCAAG               | CACCATGTTTTGCCTGGG               | CAGGAAAGGCACATGCAG             |
| 3 (36996465–36996653)           | CTCAGCTCGAACCATGG                | CTCTTCTCCTTCTGATGG               | CTTACCTATGCTGTGACTGG           |
| 4 (36992704–36992937)           | CTCGTGGCTCAGGTGTGG               | CCTCACGTGCGGTGACAG               | CTGATGGAGTACGACGAG             |
| 5 (36913347–36913581)           | GACTAACTCAGCTTGGTGG              | CAGAGTATTCAGCCATGG               | CTCACCTGTCACAATGGG             |
| 6 (36871987–36872254)           | GTGAGAGCGTGTGAGCG                | GTTGCTTGTATTCCCTCAGG             | CAGTGCAAACCTACCAGG             |
| 7 (36836858–36837093)           | CACTCCATAATGATGTGG               | GAAGTGGATTTGACGTTTGG             | GGAACCTCCAGGAGTCG              |
| 8 (36996229–36996479)           | CACAGCATAGTAAGAGG                | CAGCACACGTAATGCG                 | CAATTTTCTGTCTCATGGTG           |
| 9 (36995778–36996057)           | GCACCTGCACTCTTGAGTG              | GGTGACGTCTGAGAGTG                | GTTTCTGTATCCCAAGTGG            |
| 10 (36995299–36995594)          | GAATGGGCGAGTCCTGG                | CTGATCTCCATGGTTGG                | GTCTTCCCTTCTTATAGG             |
| 11 (36994780–36995032)          | GAAGAATAATTCTACTGTAGG            | GTTCAAAAATACCAGG                 | CAGAGCCCATGACATTGG             |
| 12 (36994315–36994566)          | CTGAAATGTGAGAAGAAAGG             | CTACTCTAAGAGTCAAAGG              | GCTGAATTGCCATTTCTGG            |
| 13 (36993761–36994012)          | GATAAATAATAGCACTCTGG             | CGAAGCAGATTAGTTATAGG             | GAAGTCGAGGTTGTAGTG             |
| 14 (36993279–36993548)          | GCCTCTTATTAGCTGTATG              | GATAATGCCTCAATGCCTGG             | CAAACCTCAAACCCGAGAG            |
| 15 (36909513–36909803)          | GTGCAGTGGCATGATCTG               | CGGAGTTTACCCTCTTG                | GGAAGAATCACTATTAAG             |
| 16 (36904834–36905069)          | CGCAACATCCATCAATAGG              | GTGTCTAAGATATACTTTGAGG           | CACACGCACATGCATCTG             |
| 17 (36900684–36900945)          | CGAATGAATGAATGACATGC             | GGAAAGCATAGAGGTCCG               | CAACTGAGAACAGCTTTGG            |
| 18 (36896175–36896448)          | GGACACACAAATTCCTTGG              | CTCTTGTTGTTACATTGGG              | TCCTAATCCCAGAACCTG             |
| 19 (36891580–36891853)          | AGATCCTCTACCATCTTG               | ACAGAGCATCACCATTAGG              | TGAGGAAATGGCGTATCAG            |
| 20 (36887153–36887432)          | TAGAAGTGAGGTTCACTGG              | TCCCTGATCCACAGCG                 | TCAGTCTGAGCTTCTCTG             |
| 21 (36882072–36882337)          | ATCCTTTAGAGCACTCAGG              | CTCCTGTCTCTGGAGCAG               | CGGAACCAGCAACTGTTG             |
| 22 (36877094–36877377)          | GAGATCCTACCTTCATCG               | TTCAGGTGCTGGTATCAC               | AACAGGGACTTCAATTCAG            |
| 23 (36904035–36904317)          | CTTTGCTCCATTTACACGG              | CACGTACCTGAATGTTTGG              | TAAGTGCACCTCCAGAGG             |
| 24 (36903173–36903431)          | GGTGAAGGACTTAGCTGG               | TGTGAGGAGGAGACAGAG               | GTCTTTGTGGGTATTTCCG            |
| 25 (36902089–36902331)          | TCACAGCTTCTGGCAAGG               | TGGGCTCTTGTCCAGAG                | AGACTCCACCACTTCTG              |
| 26 (36899524–36899761)          | GTCTACATTCCCAAGTGG               | ACTTACCTTACCTGTCTGG              | CTTCTGCTGTGAGAGAG              |
| 27 (36898527–36898817)          | TCTGCTAATGGTCTCATAG              | GCTTGTCTTGTGGTCAG                | CATGAAGGAGGAGTTCAG             |
| 28 (36897501–36897760)          | TCAGGATGTACACATACAG              | CTTCCACCTGTCTGATG                | CCTGTTACCTCTGTCTG              |

**Table S4. Restriction enzymes and primers for LDI-PCR**

| Case no. | Restriction enzyme | First Forward primer sequence | Second Forward primer sequence | Reverse primer sequence |
|----------|--------------------|-------------------------------|--------------------------------|-------------------------|
| 9119     | Nla III            | GAAGTGTGTCTGAGATTGG           | CCCAGAAATGGCAATTCAG            | CTTTGACTCTTAAGAGTAGG    |
| 8726     | Bsl I              | AGCCACCCAACCAACCAG            | GTCACAGCATAGGTAAGAGG           | GCTATTTACCATCAGGAAGG    |
| 4443     | NcoI/ApaI          | AGCCACCCAACCAACCAG            | GTCACAGCATAGGTAAGAGG           | GCTATTTACCATCAGGAAGG    |
| 2398     | Nco I              | CACAGCATAGGTAAGAGG            | CAGCACACGTAATAATGCG            | GCTATTTACCATCAGGAAGG    |
| 7550     | Nco I/Bsl I        | GCACTTGCACTCTTGAGTG           | GGTGACGTCTGAGAGTGG             | ATCTGACATTCTATAGACCC    |
| 4451     | TaqI               | ACTTACCTTACCTGCTGG            | CTCTCTCAAGCCAGGAAG             | TGGGAATGTAGACCCAAG      |
| 5618     | PstI/SphI          | TGTGAGGAGGAGACAGAG            | AGCGGAAATACCCACAAAG            | CTGTCCTCTCTGGCAGG       |
| 7106     | Nco I              | CACAGCATAGGTAAGAGG            | CAGCACACGTAATAATGCG            | GCTATTTACCATCAGGAAGG    |

**Table S5. Oligonucleotide primers and probes used for PAX5 genomic DNA real-time PCR**

| Primer                     | Sequence                             |
|----------------------------|--------------------------------------|
| <i>PAX5</i> exon 3 Forward | 5'-GGTTCCTCATGGCTAAGCTTCTT-3'        |
| <i>PAX5</i> exon 3 Reverse | 5'-CCTCACCTGTTGATGGAAGTGA-3'         |
| <i>PAX5</i> exon 3 Probe   | 6FAM-CGCCACACCCAAAGTGGTGAAAAA-TAMRA  |
| <i>PAX5</i> exon 6 Forward | 5'-TGTCTTTCTTTAGCAACGTGTATAACC-3'    |
| <i>PAX5</i> exon 6 Reverse | 5'-TGGTGGGCGTGCATCAC-3'              |
| <i>PAX5</i> exon 6 Probe   | 6FAM-ACGGCCACTCGTTCCGGG-TAMRA        |
| <i>PAX5</i> exon 8 Forward | 5'-GGGCACATTGCCGTTCA-3'              |
| <i>PAX5</i> exon 8 Reverse | 5'-GACGCCGACAGTGCAAAC-3'             |
| <i>PAX5</i> exon 8 Probe   | 6FAM-CCCCGCTGGACAGGGCAGC-TAMRA       |
| <i>ATP10A</i> Forward      | 5'-AGCCCCATGGTGAGTGACAG-3'           |
| <i>ATP10A</i> Reverse      | 5'-GTAGGATTAATATAGACACCTCCATGAG-3'   |
| <i>ATP10A</i> Probe        | 6FAM-CCACGTCTCTCCCATTTCCACCATC-TAMRA |
